# Supplementary material
Source: PubMed Central journal article supplement (PMC2927966)
Supplement: NIHMS227696-supplement-supplement_1.pdf [file NIHMS227696-supplement-supplement_1.pdf]

## Supplementary Materials:

### Chemicals and Reagents

Recombinant human CRP and PD98059, a specific ERK1/2 inhibitor, were purchased from Calbiochem (San Diego, CA). Anti-human CRP antibody, seleno-L-methionine (SeMet) and apoA-I were obtained from Sigma (Saint Louis, MI). [ $1\alpha,2\alpha(n)^3\text{H}$ ]-Cholesterol was purchased from Amersham (Piscataway, NJ), and human acetylated low density lipoprotein (acLDL) and high density lipoprotein (HDL) were obtained from Intracel (Frederick, MD). Rabbit polyclonal anti-ABCA1 and anti-ABCG1 antibodies, and mouse monoclonal anti- $\beta$ -actin antibody were obtained from Novus Biologicals (Littleton, CO). Horseradish peroxidase-conjugated goat anti-rabbit IgG and anti-mouse IgG were purchased from Jackson Immuno-Research (West Grove, PA). Mn (III) tetrakis (4-benzoic acid) porphyrin (MnTBAP), a cell permeable superoxide dismutase (SOD) mimetic, was purchased from A.G. Scientific (San Diego, CA).

**Table I.** Genes and sequences of PCR primers

| Gene           | GenBank No. | Forward primer           | Reverse primer          |
|----------------|-------------|--------------------------|-------------------------|
| SR-B1          | NM_005505   | ACCGCACCTTCCAGTTCAG      | ATCACCGCCGCACCCAAG      |
| Caveolin-1     | NM_001753   | GACATCTCTACACCGTTCCCATCC | TCGTACACTTGCTTCTCGCTCAG |
| Caveolin-2     | NM_198212   | GCTGCGATGGGGCTGGAG       | GCTGTGGTGGCTGTAGGAGTC   |
| CYP27A-1       | NM_000784   | CACGACATCCAACACGCTGAC    | GCACCACACCACCACTTCC     |
| ABCA1          | NM_005502   | GTCCTCTTCCCGCATTATCTGG   | AGTTCCTGGAAGGTCTTGTTAC  |
| ABCG1          | NM_004915   | CGGAGCCCAAGTCGGTGTG      | TTCAGATGTCCATTCAGCAGGTC |
| p22phox        | BT006861    | CAGATCGAGTGGGCCATGTG     | AAAGTACCACTGGGTGAAGCG   |
| p47phox        | AF330627    | TGGATCCCAGCATCCTTCCTC    | CCTTGATGGCGACGTATGGC    |
| p67phox        | AF527950    | TGTTTCGACCAAATGAGAGACAAG | GCAAACCCAGAGAACTGTCTTG  |
| SOD1           | NM_000454   | ATGACTTGGGCAAAGGTGGAATG  | GTAAAGGGGCTCAGACTACATCC |
| Catalase       | NM_001752   | GCGGAGATTCAACACTGCCAATG  | CTGTTCTCATTACAGCACGTTAC |
| GPX1           | NM_000581   | CGAGGGAGGAACACCTGATCTTAC | GGGAAACTCGCCTTGGTCTGG   |
| $\beta$ -actin | BC013835    | CTGGAACGGTGAAGGTGACA     | AAGGGAATTCCTGTAACAATGCA |

ABCA1 (G1): ATP-binding membrane cassette transport protein A1 (G1); GPX: glutathione peroxidase; SR-B1: scavenger receptor B1; SOD: superoxide dismutase.
